# Supplementary material
Source: HighWire-hosted journal article supplement (https://ard.bmj.com/content/annrheumdis-2020-217528)
Supplement: inline-supplementary-material-3 [file inline-supplementary-material-3.pdf]

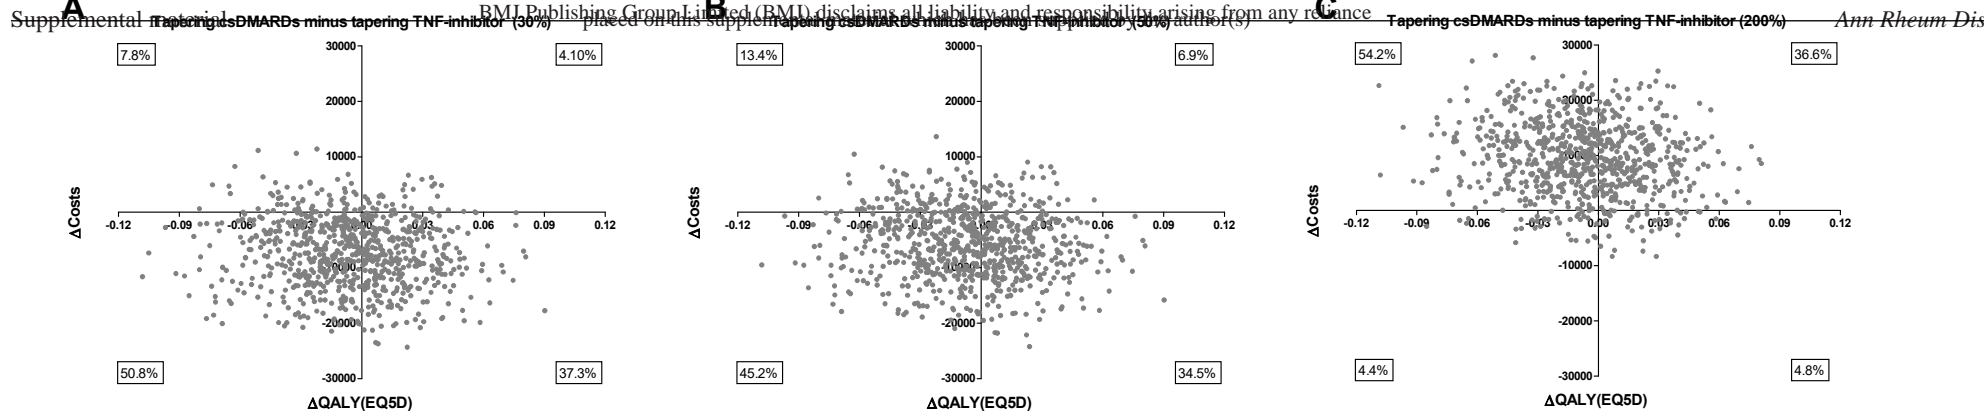

**Figure S2 Cost-effectiveness planes with results of sensitivity analyses to investigate biological price changes.**

(A) 30%, (B) 50%, and (C) 200% of original biological prices were taken to investigate the effect of price changes.
